# Supplementary material
Source: PubMed Central journal article supplement (PMC2154471)

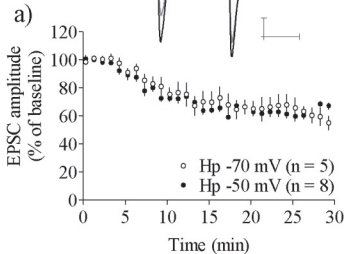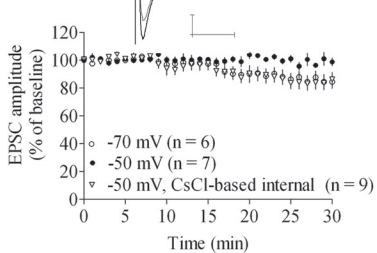

Supplement: supp_0706873104_06873Fig4.pdf [file supp_0706873104_06873Fig4.pdf]

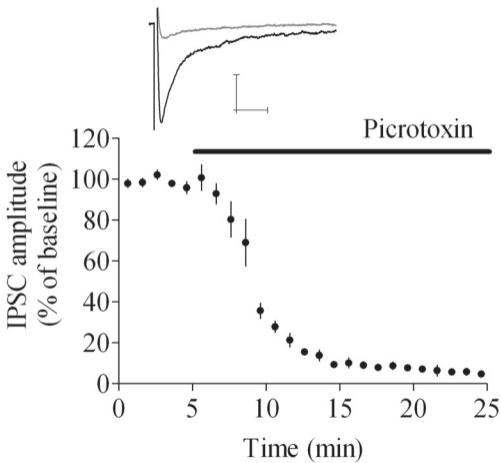

Supplement: supp_0706873104_06873Fig5.pdf [file supp_0706873104_06873Fig5.pdf]
